# Supplementary material
Source: PubMed Central journal article supplement (PMC3236612)

Fig. S1

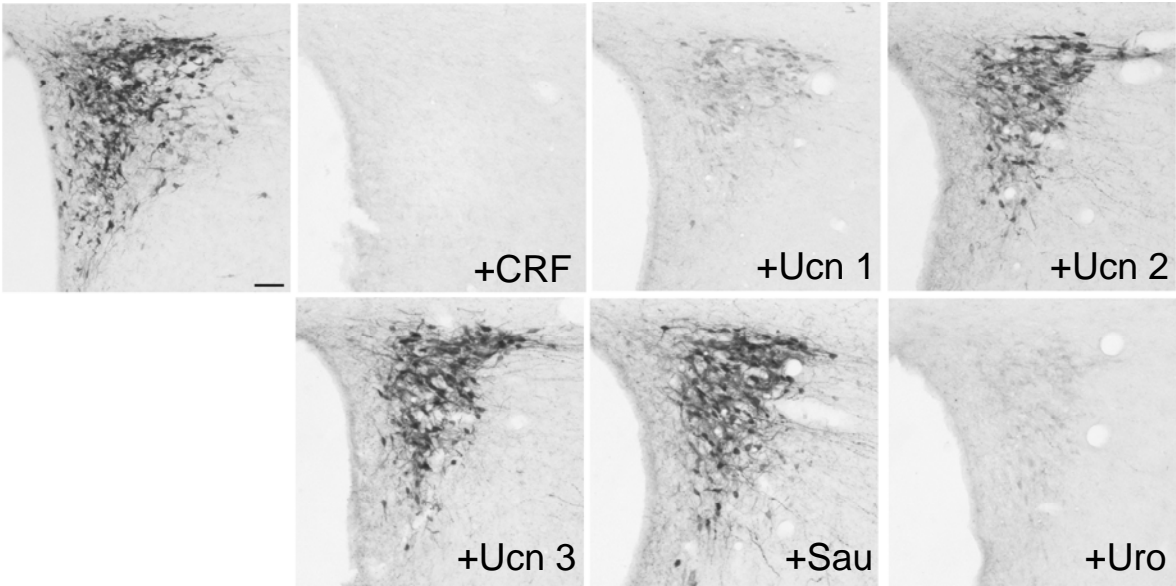

Fig. S2

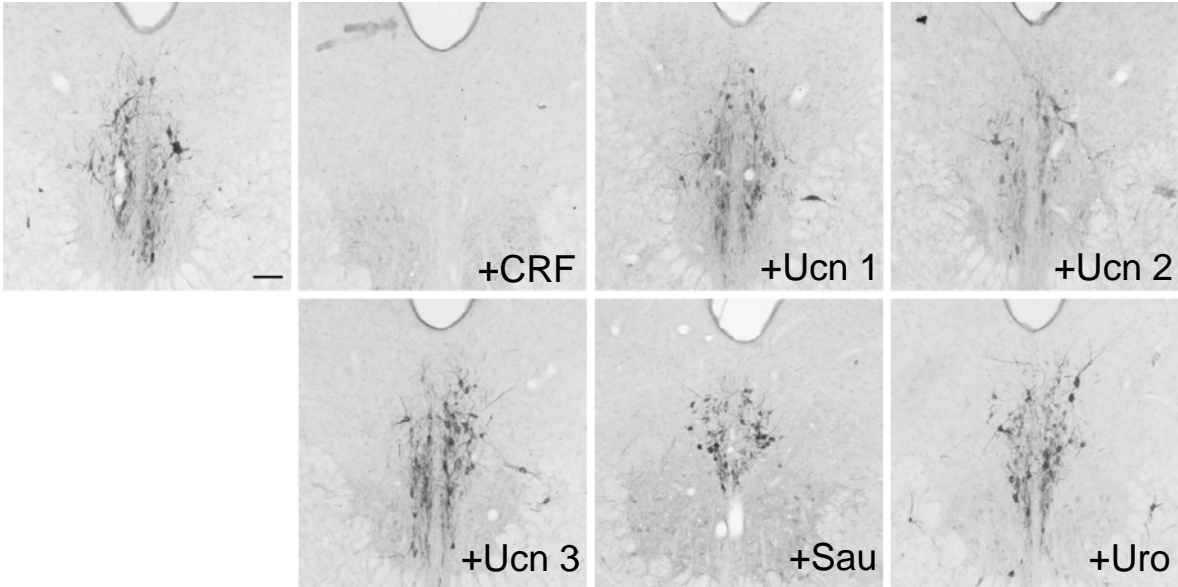

Supplement: NIHMS314136-supplement-02.pdf [file NIHMS314136-supplement-02.pdf]
